# Supplementary material for: Heterostructure enhanced sodium storage performance for SnS2 in hierarchical SnS2/Co3S4 nanosheet array composite
Source: Royal Society of Chemistry journal article supplement (doi:10.1039/d0ta08746g), 2020-12-21
Supplement: d0ta08746g1.pdf [file d0ta08746g1.pdf]

## Electronic supplementary information

### Heterostructure enhanced sodium storage performance for SnS<sub>2</sub> in hierarchical SnS<sub>2</sub>/Co<sub>3</sub>S<sub>4</sub> nanosheet array composite

Lele Cheng, Yingmeng Zhang, Panpan Chu, Suhang Wang, Yongliang Li, Xiangzhong Ren, Peixin Zhang and Lingna Sun\*

College of Chemistry and Environmental Engineering, Shenzhen University, Shenzhen, Guangdong 518060, P.R. China. Tel/Fax: +86-755-26538657, E-mail: lindasun1999@126.com; sunln@szu.edu.cn

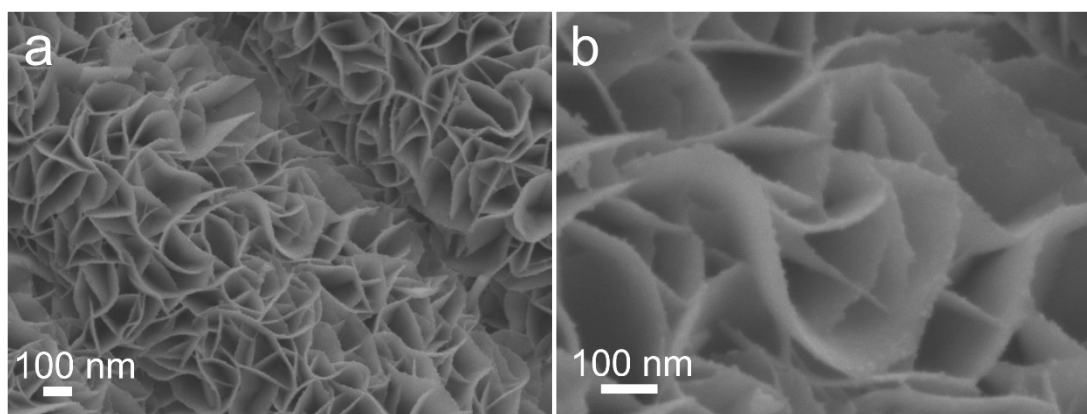

Fig. S1. The morphology characterization of the SnS<sub>2</sub>@CC composite: Low magnification (a); high magnification SEM image (b).

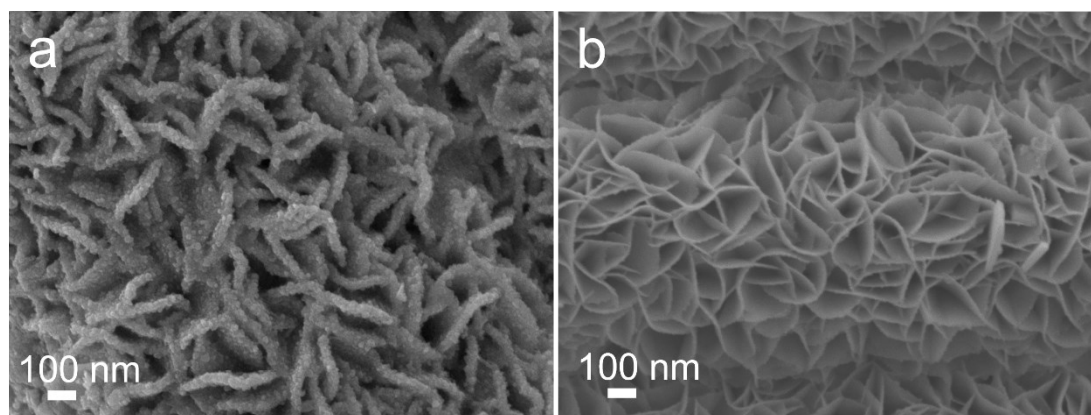

Fig. S2 The morphology characterization of the SnS<sub>2</sub>/Co<sub>3</sub>S<sub>4</sub>@CC (a) and the SnS<sub>2</sub>@CC (b) composite: SEM images magnification was 3000 times.

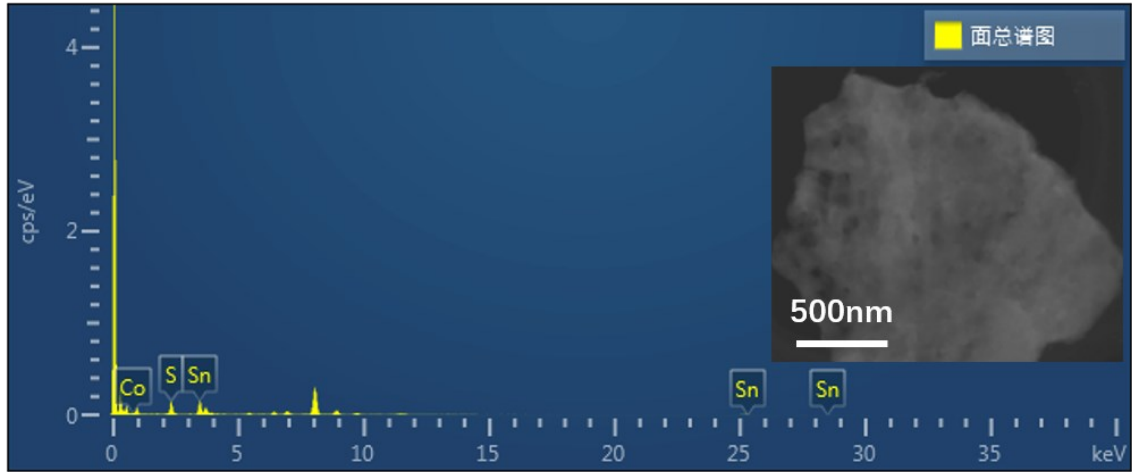

Fig. S3 The energy dispersive X-ray spectrum of the SnS<sub>2</sub>/Co<sub>3</sub>S<sub>4</sub> heterostructure nanosheets.

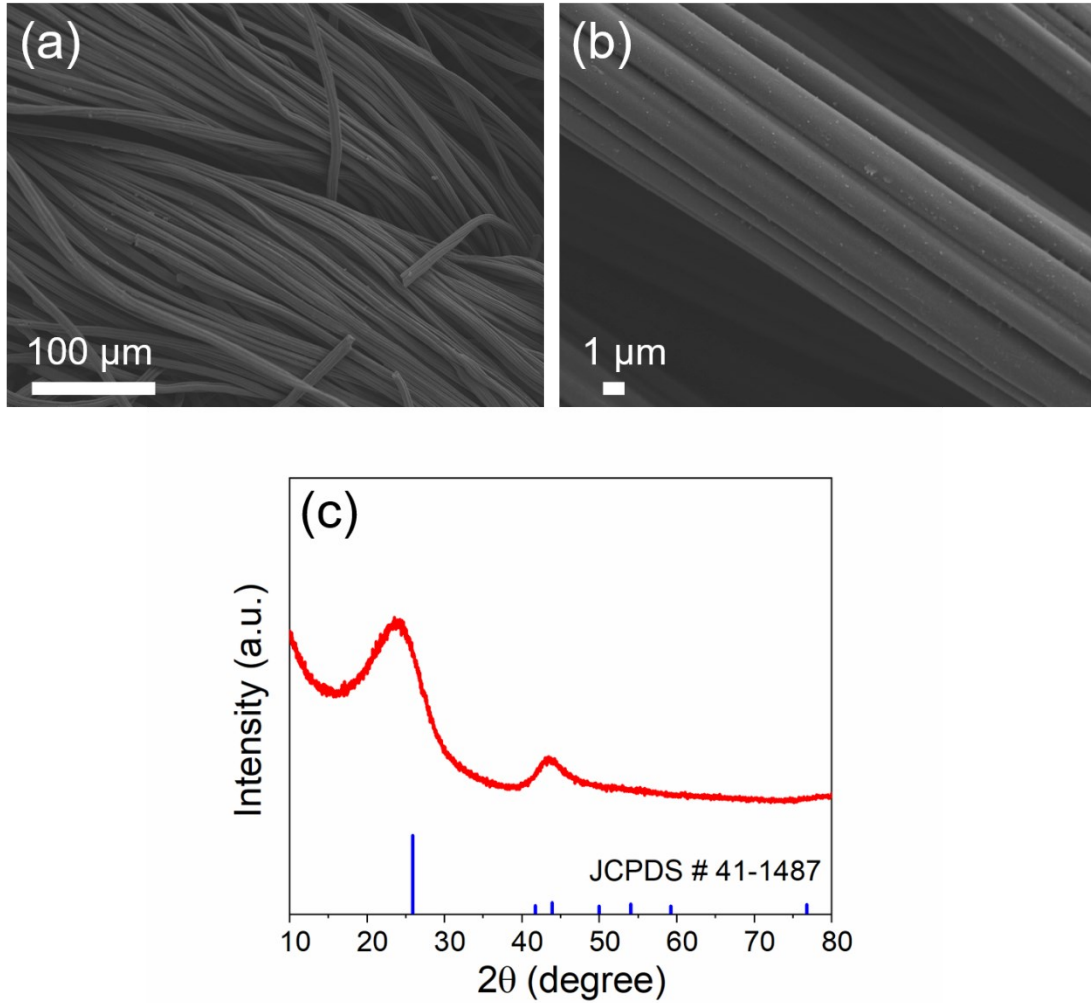

Fig. S4 The  $\text{Co}_3\text{S}_4$  samples grown on carbon fabric by oil bath method: low magnification (a); high magnification SEM image (b); the XRD pattern(a).

By using the oil bath method, controlling the same experimental conditions, try to grow  $\text{Co}_3\text{S}_4$  nanoparticles on the treated carbon cloth fibers. It was observed that the carbon cloth fiber bundle was very smooth, and no other special shapes were found. In the XRD test, except for indicating that under the same experimental conditions,  $\text{Co}_3\text{S}_4$  nanoparticles could not grow on carbon cloth fibers through an oil bath. Apart from the relatively flat carbon peak, no other characteristic diffraction peaks were found.

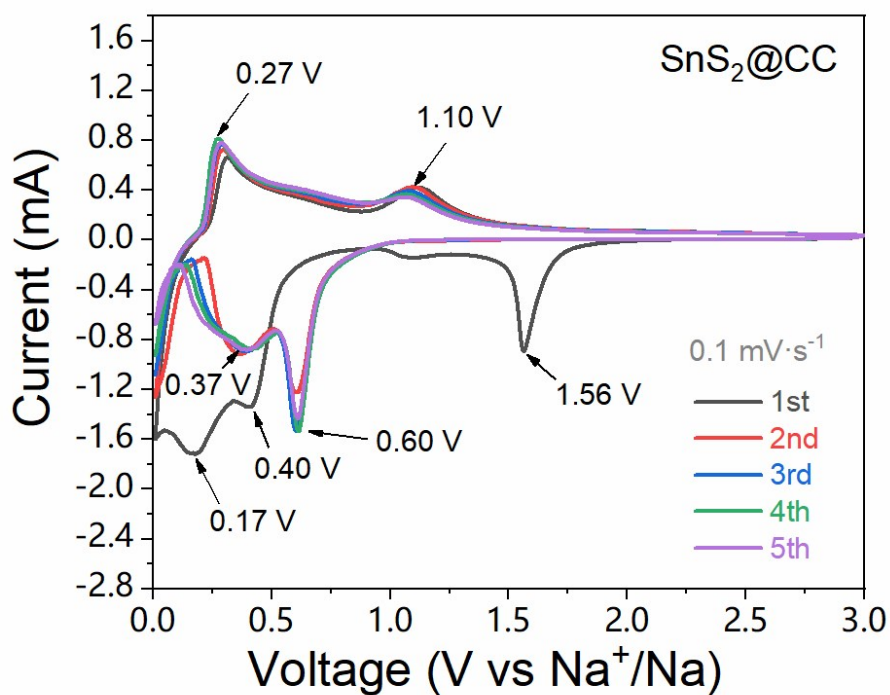

Fig. S5 The initial five CV curves of the SnS<sub>2</sub>@CC electrode at a scan rate of 0.1 mV·s<sup>-1</sup> between 0.01 and 3.0 V.

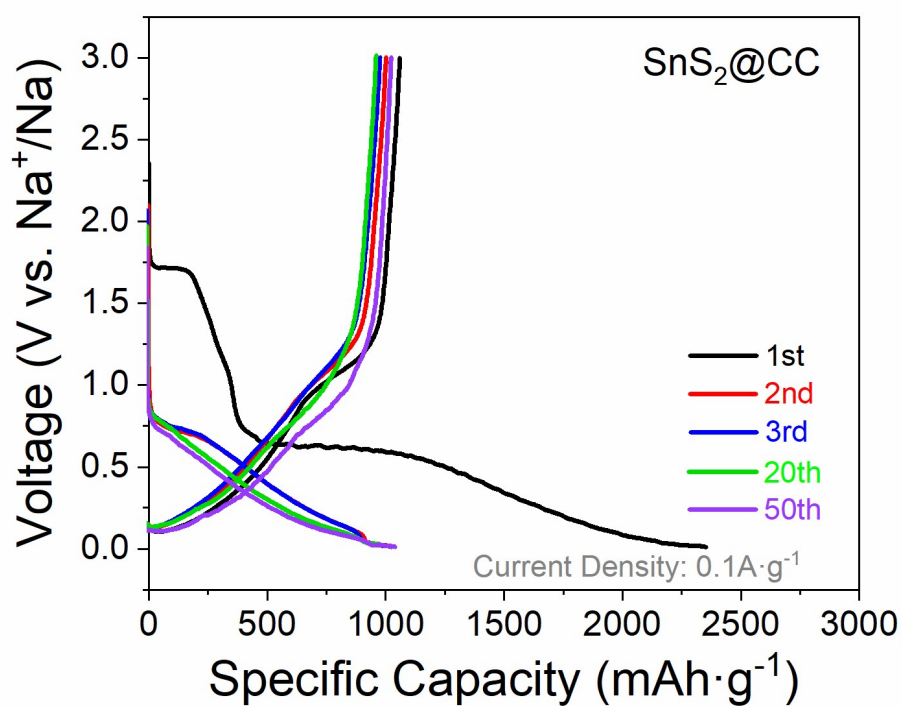

Fig. S6 Galvanostatic charge/discharge profiles during the first, second, third, 20th and 50th cycles of the SnS<sub>2</sub>@CC electrode at current density of 0.1 A·g<sup>-1</sup>.

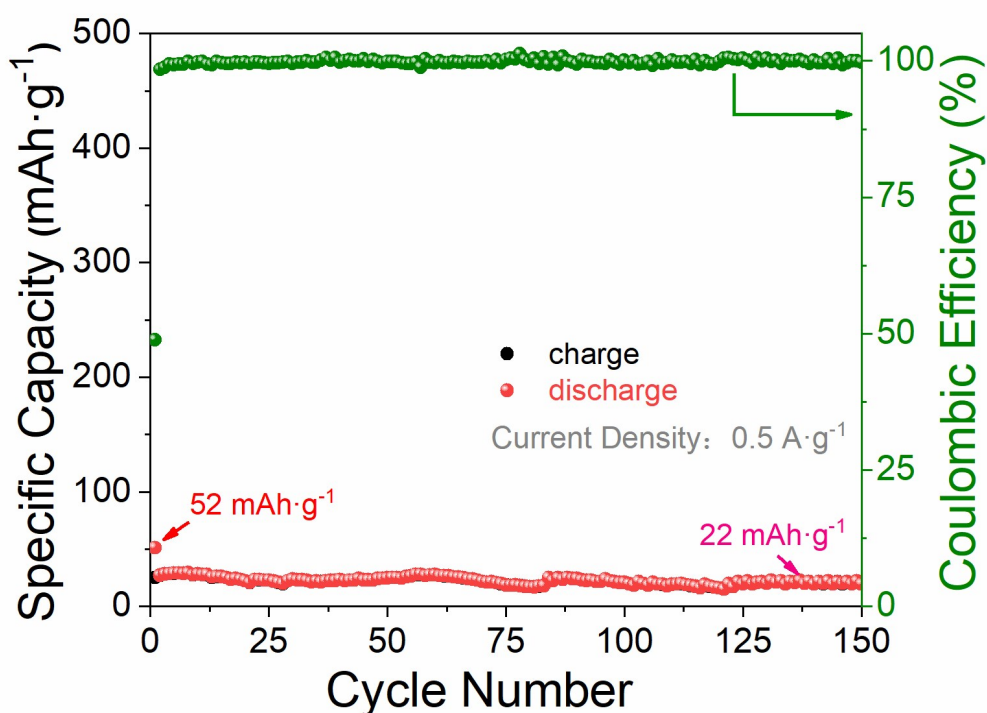

Fig. S7 Cycling performance at  $0.5 \text{ A}\cdot\text{g}^{-1}$  for the pure carbon cloth fibers.

**Table S1. Comparison of the electrochemical performance of  $\text{SnS}_2/\text{Co}_3\text{S}_4@\text{CC}$  anodes with other Sn-based sulfides used in SIBs in recent papers.**

| Materials description                                 | Cycling data                                  | Rate capability                              | Reference |
|-------------------------------------------------------|-----------------------------------------------|----------------------------------------------|-----------|
| SnS on graphene foam                                  | 1010/200th/0.1C                               | 410/30C                                      | 1         |
| SnS <sub>2</sub> /rGO                                 | 627/100th/0.2C                                |                                              | 2         |
| SnS nanorods                                          | 370/30th/0.125C                               | 300/1C                                       | 3         |
| SnS/SnO <sub>2</sub>                                  | 409/500th/0.81C                               | 430/2.43C                                    | 4         |
| SnS <sub>2</sub> /graphene                            | 670/60th/0.02C                                | 670/60th/0.02C                               | 5         |
| SnS <sub>2</sub> /N-graphene                          | 450/100th/0.2C                                | 148/10C                                      | 6         |
| SnS <sub>2</sub> -rGO composite                       | 628/100th/0.2C                                | 544/2C                                       | 7         |
| SnS <sub>2</sub> /CC                                  | 1039.9/130th/0.2 $\text{A}\cdot\text{g}^{-1}$ | 673.4/400th/2 $\text{A}\cdot\text{g}^{-1}$   | 8         |
| SnS <sub>2</sub> /Co <sub>3</sub> S <sub>4</sub> -rGO | 1141.8/50th/0.1 $\text{A}\cdot\text{g}^{-1}$  | 845.7/100th/0.5 $\text{A}\cdot\text{g}^{-1}$ | 9         |
| ZnS/SnS <sub>2</sub> @NSC                             | 537.8/120th/1 $\text{A}\cdot\text{g}^{-1}$    | 456.2/100th/5 $\text{A}\cdot\text{g}^{-1}$   | 10        |
| SnS <sub>2</sub> /Co <sub>3</sub> S <sub>4</sub> @CC  | 1259.5/100th/0.1 $\text{A}\cdot\text{g}^{-1}$ | 637.2/760th/2 $\text{A}\cdot\text{g}^{-1}$   | this work |

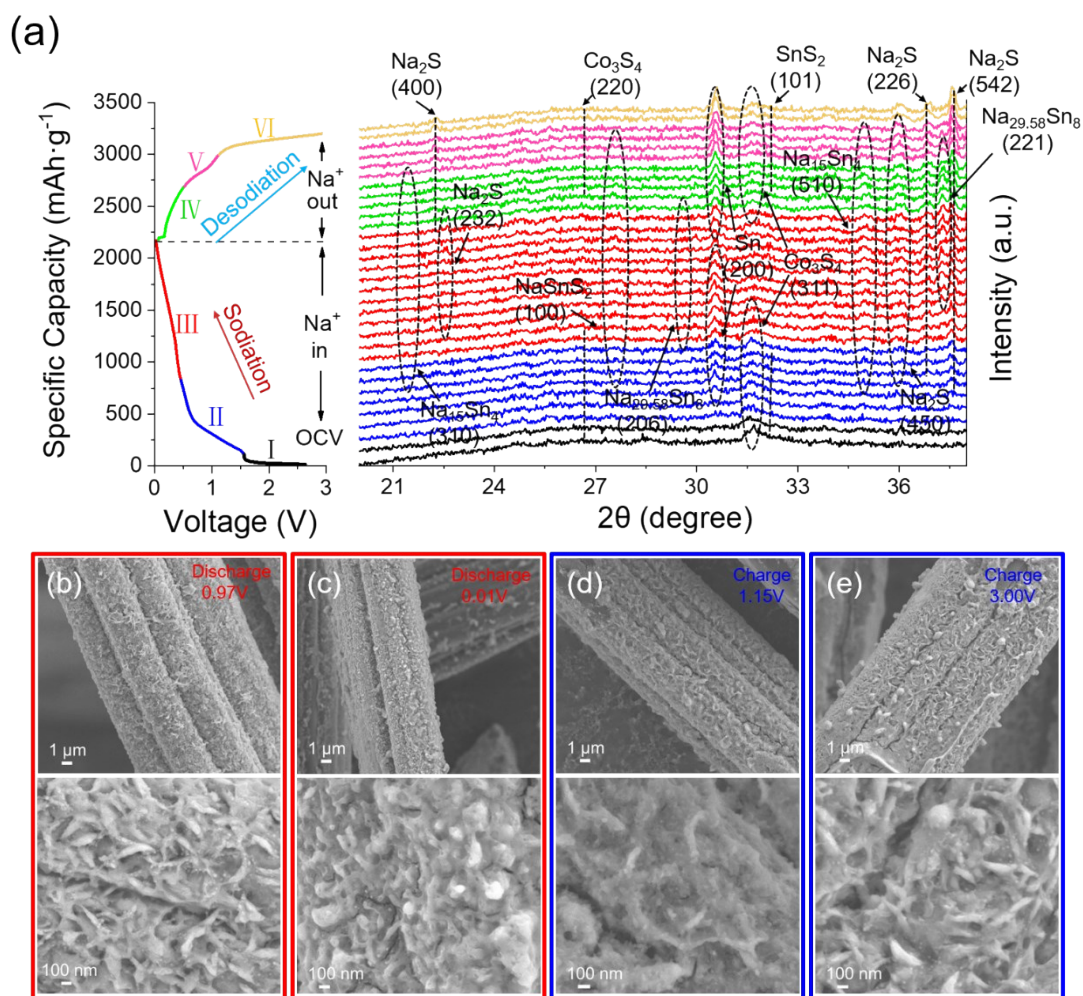

Fig. S8 Selective in-situ XRD patterns at different discharge/charge stages obtained at current density of  $0.1 \text{ A g}^{-1}$  within a potential window from 0.01 to 3.0 V (a); Ex situ FESEM images of  $\text{SnS}_2/\text{Co}_3\text{S}_4@\text{CC}$  electrodes at sodiated states of 0.97 V (b1, b2) and 0.01 V (c1, c2) and desodiated states of 1.15 V (d1, d2) and 3.00 V (e1, e2).

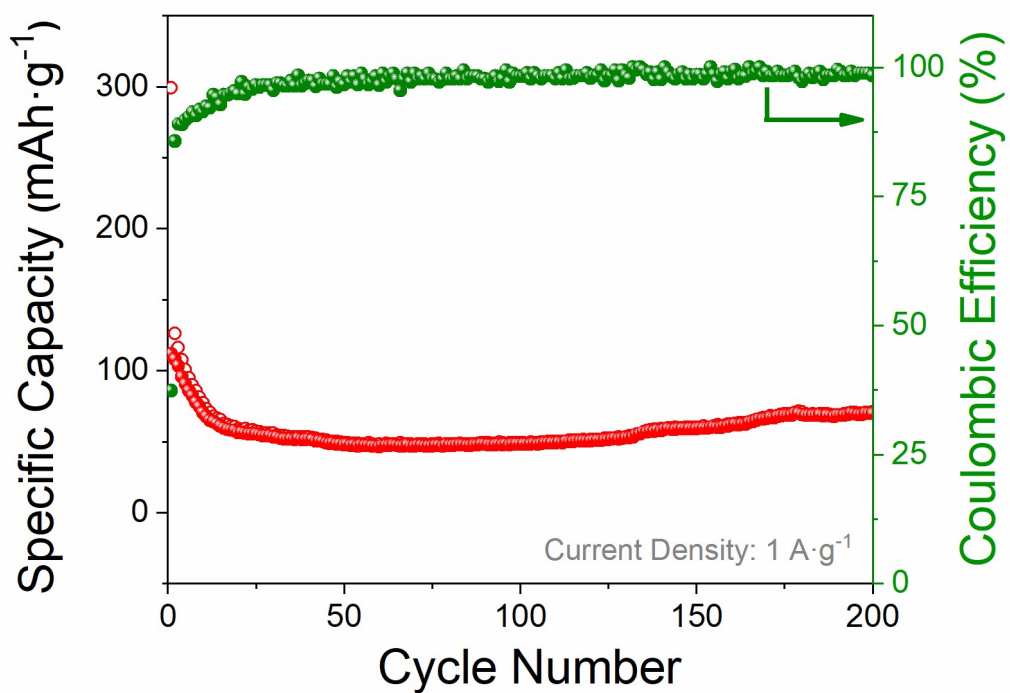

Fig. S9  $\text{SnS}_2/\text{Co}_3\text{S}_4@\text{CC}/\text{Na}_3\text{V}_2(\text{PO}_4)_2\text{O}_2\text{F}$  constant current cycle performance of full cell battery at  $1\text{ A}\cdot\text{g}^{-1}$ .

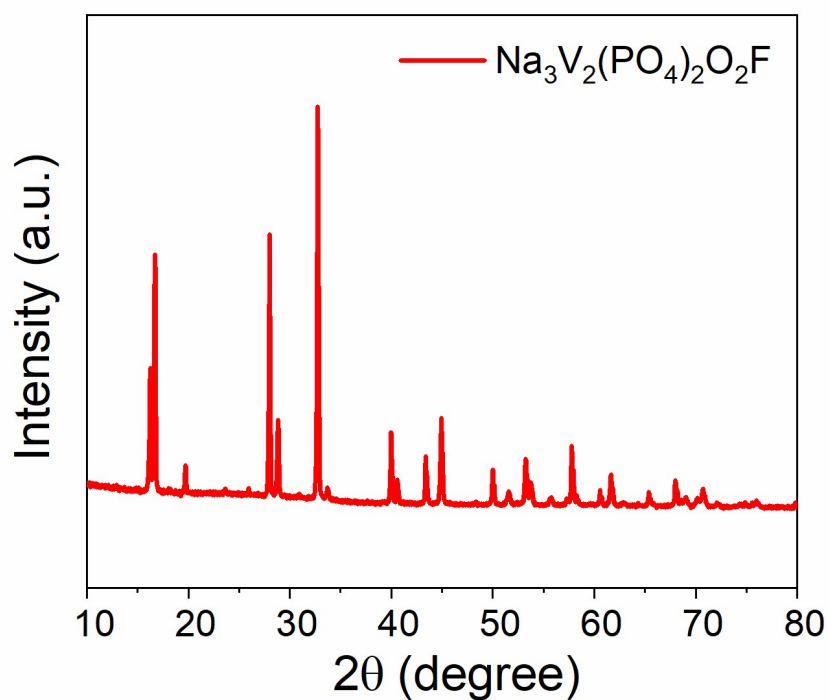

Fig. S10 XRD pattern of the  $\text{Na}_3\text{V}_2(\text{PO}_4)_2\text{O}_2\text{F}$  material.

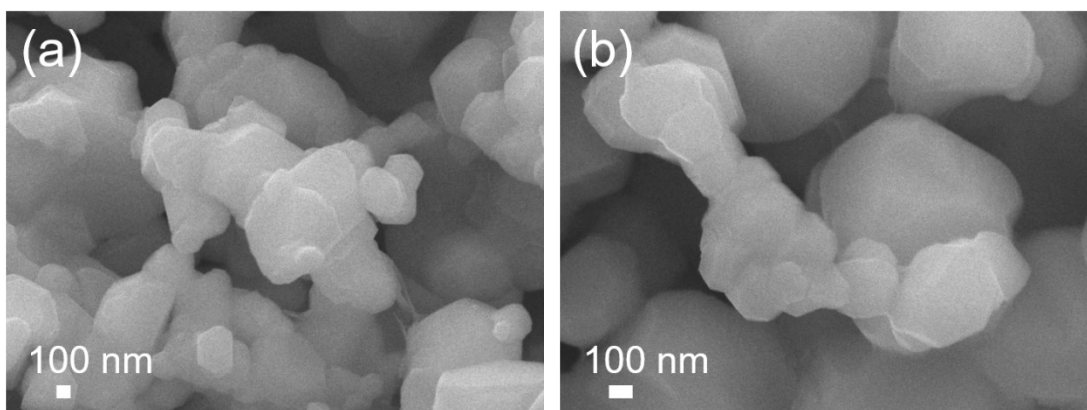

Fig. S11 (a, b) SEM images of the  $\text{Na}_3\text{V}_2(\text{PO}_4)_2\text{O}_2\text{F}$  electrode.

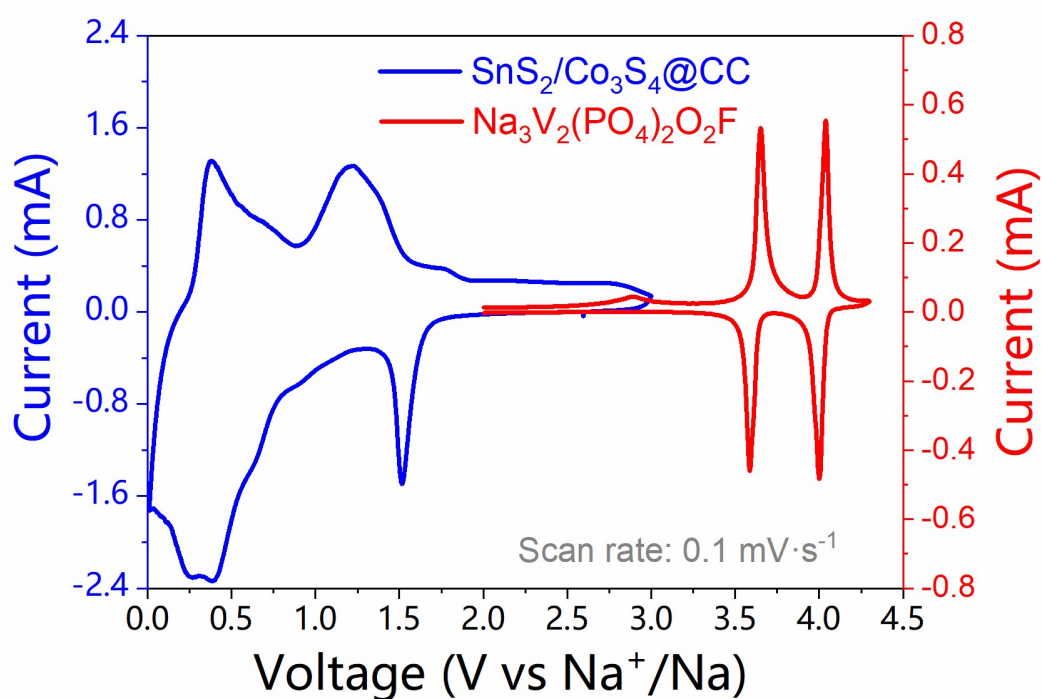

Fig. S12 CV curves of  $\text{Na}_3\text{V}_2(\text{PO}_4)_2\text{O}_2\text{F}$  cathode and  $\text{SnS}_2/\text{Co}_3\text{S}_4@\text{CC}$  anode in half cells.



**Table S2.  $R_2$ ,  $\sigma$  and  $D_{Na^+}$  values for the  $SnS_2@CC$  and  $SnS_2/Co_3S_4@CC$  electrodes**

|                    | $R_2$ ( $\Omega$ ) | $\sigma$ ( $\Omega\text{ cm}^2\text{s}^{-0.5}$ ) | $D_{Li^+}$ ( $\text{cm}^2\text{s}^{-1}$ ) |
|--------------------|--------------------|--------------------------------------------------|-------------------------------------------|
| $SnS_2/Co_3S_4@CC$ | 46.3               | 26.35                                            | $4.0728 \times 10^{-14}$                  |
| $SnS_2@CC$         | 97.2               | 72.25                                            | $5.5049 \times 10^{-15}$                  |

**Table S3. ICP test and analysis data of the  $SnS_2/Co_3S_4@CC$**

| $SnS_2/Co_3S_4@CC$<br>(mg) | Co<br>(mg/L) | Co<br>(wt %) | $Co_3S_4$<br>(wt %) |
|----------------------------|--------------|--------------|---------------------|
|                            | 0.85         | 0.93         | 1.60                |
| 90.70                      | Sn<br>(mg/L) | Sn<br>(wt %) | $SnS_2$<br>(wt %)   |
|                            | 5.67         | 6.26         | 9.64                |

**Table S4. ICP test and analysis data of the  $SnS_2@CC$**

| $SnS_2@CC$<br>(mg) | Sn<br>(mg/L) | Sn<br>(wt %) | $SnS_2$<br>(wt %) |
|--------------------|--------------|--------------|-------------------|
| 73.40              | 4.58         | 6.24         | 9.61              |

## References

1. D. Chao, C. Zhu, P. Yang, X. Xia, J. Liu, J. Wang, X. Fan, S. Savirov, J. Lin, H. Fan and Z. Shen, *Nat. Commun.*, 2016, **7**, 12122.
2. C. Ma, J. Xu, J. Alvarado, B. Qu, J. Somerville, J. Lee and Y. Meng, *Chem. Mater.*, 2015, **27**, 5633-5640.
3. P. Dutta, U. Sen and S. Mitra, *RSC Adv.*, 2014, **4**, 43155-43159.
4. Y. Zheng, T. Zhou, C. Zhang, J. Mao, H. Liu and Z. Guo, *Angew. Chem. Int. Ed.*, 2016, **55**, 3408-3413.
5. X. Xie, D. Su, S. Chen, J. Zhang, S. Dou and G. Wang, *Chem Asian J*, 2014, **9**, 1611-1617.
6. Y. Jiang, Y. Feng, B. Xi, S. Kai, K. Mi, J. Feng, J. Zhang and S. Xiong, *J. Mater. Chem. A*, 2016, **4**, 10719-10726.
7. B. Qu, C. Ma, G. Ji, C. Xu, J. Xu, Y. Meng, T. Wang and J. Lee, *Adv. Mater.*, 2014, **26**, 3854-3859.
8. L. Wang, J. Yuan, Q. Zhao, Z. Wang, Y. Zhu, X. Ma and C. Cao, *Electrochim. Acta*, 2019, **308**, 174-184.
9. Y. Wu, H. Yang, Y. Yang, H. Pu, W. Meng, R. Gao and D. Zhao, *Small*, 2019, **15**, 1903873.
10. L. Cao, B. Zhang, X. Ou, C. Wang, C. Peng and J. Zhang, *Small*, 2019, **15**, 1804861.
